# Supplementary material for: Premotor cortex modulates somatosensory cortex during voluntary movements without proprioceptive feedback
Source: Springer Nature journal article supplement (doi:10.1038/nn1873), 2007-03-18
Supplement: nn1873-S2.pdf [file nn1873-S2.pdf]

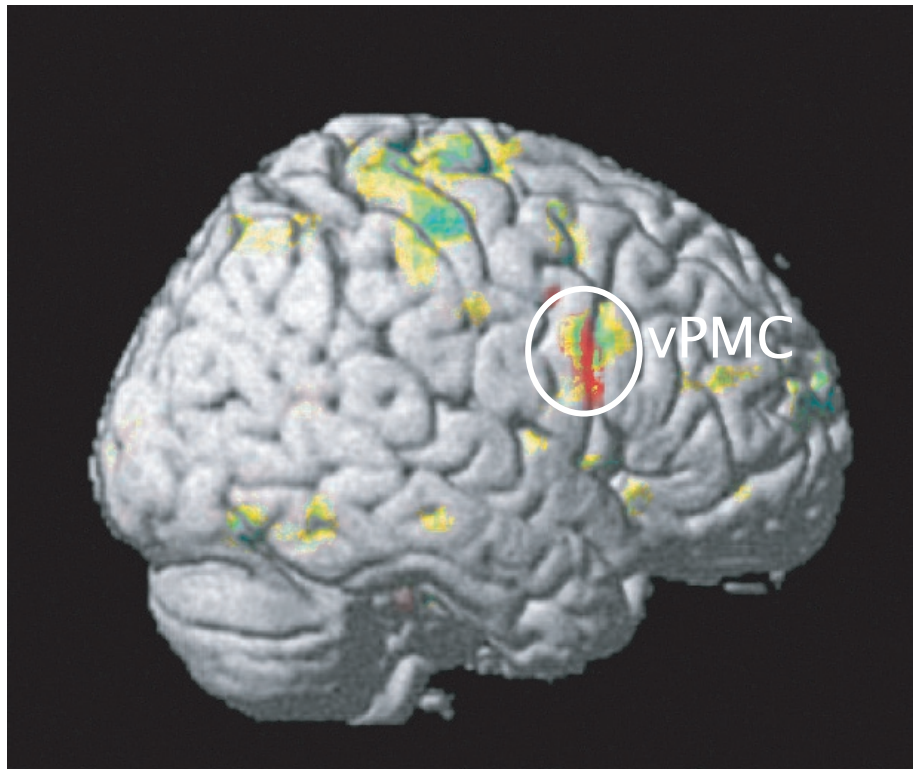

**Figure S2:** Regions depicted in green-yellow display regions that are significantly more activated during INB than in pre, post and post baseline in the control experiment without visual feedback, i.e. the conjunction  $(C2n > C1n \wedge C2n > C3n \wedge C2n > C4n)$  (thresholded at  $q < 0.05$  FDR-correction). In red is depicted the regions of vPMC showing more activation in the main experiment during INB. Notice that there is an overlap, confirming that the region in vPMC is more activated during INB regardless of whether the visual feedback is present or absent.
